# Supplementary material for: A novel chemiluminescence signal amplification strategy based on a capillary electrophoresis platform for highly sensitive competitive immunoassay of biomolecules
Source: Royal Society of Chemistry journal article supplement (doi:10.1039/c8ay01987h), 2018-01-01
Supplement: c8ay01987h1.pdf [file c8ay01987h1.pdf]

## *Supporting Information*

### **A novel chemiluminescence signal amplification strategy based on the capillary electrophoresis platform for highly sensitive competitive immunoassay of biomolecules**

Min Shi, Jingjin Zhao, Shuting Li,\* Jianniao Tian, Shulin Zhao\*

State Key Laboratory for the Chemistry and Molecular Engineering of Medicinal Resources, Guangxi Normal University, Guilin, 541004, China

#### **Table of contents**

Supplementary figures and table

|                 |     |
|-----------------|-----|
| Figure S1 ----- | S2  |
| Figure S2 ----- | S3  |
| Figure S3 ----- | S4  |
| Figure S4 ----- | S5  |
| Figure S5 ----- | S6  |
| Figure S6 ----- | S7  |
| Figure S7 ----- | S8  |
| Figure S8 ----- | S9  |
| Table S1 -----  | S10 |

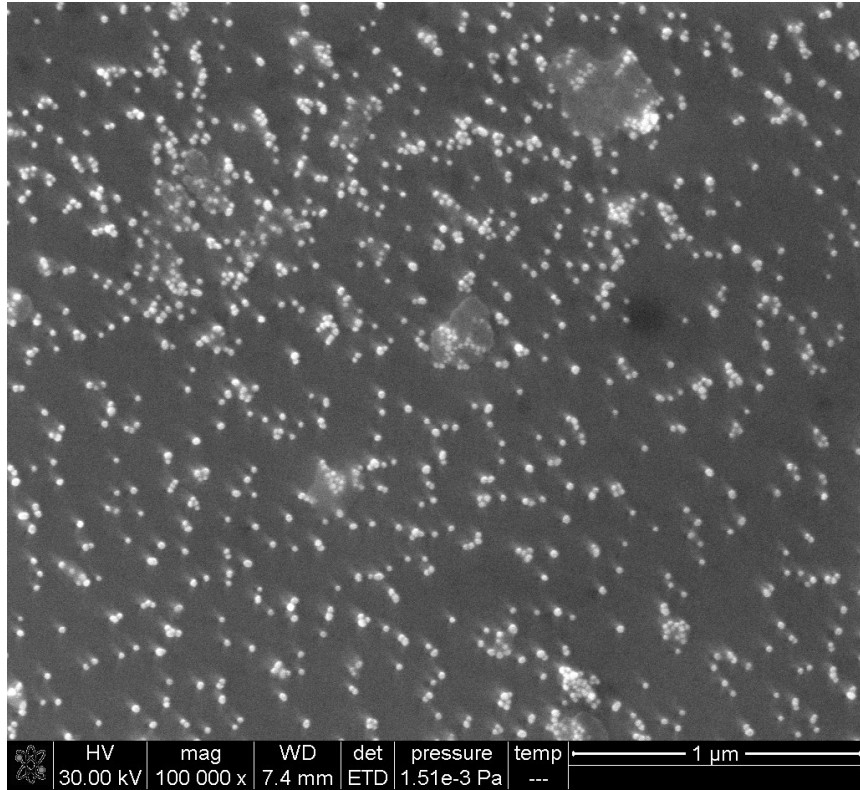

**Figure S1.** SEM image of AuNPs

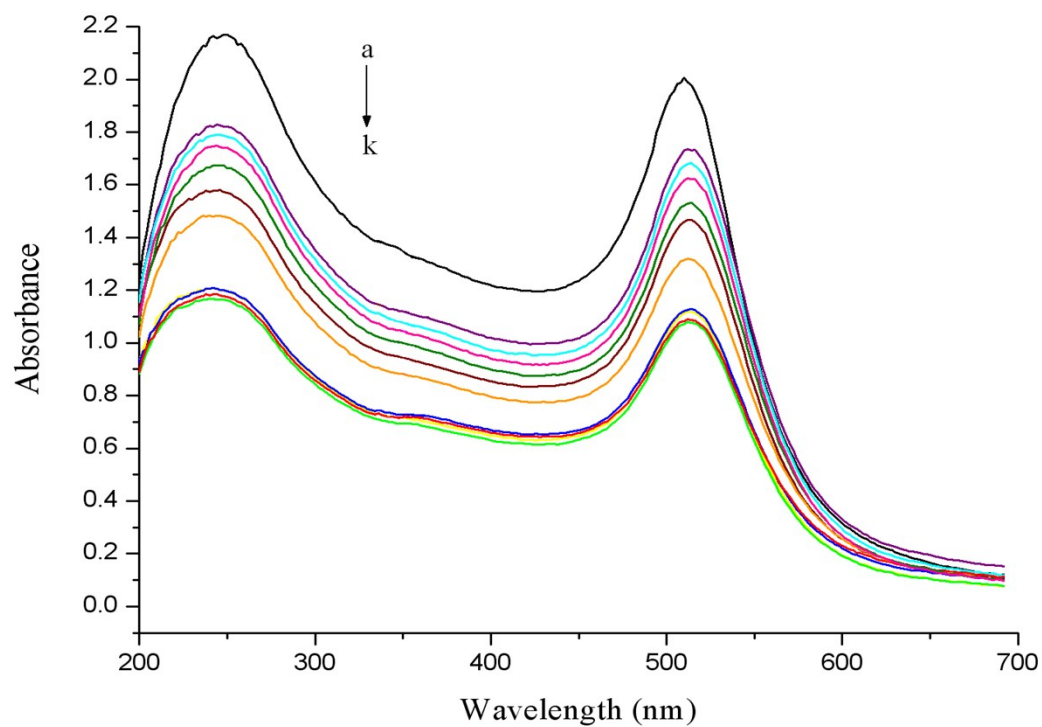

**Figure S2.** UV-Vis absorption spectra of AuNPs-MPA prepared by 3-MPA of different concentrations. (a, 0; b,  $1.0 \times 10^{-9}$ ; c,  $1.0 \times 10^{-8}$ ; d,  $5.0 \times 10^{-8}$ ; e,  $1.0 \times 10^{-7}$ ; f,  $5.0 \times 10^{-7}$ ; g,  $1.0 \times 10^{-6}$ ; h,  $5.0 \times 10^{-6}$ ; i,  $1.0 \times 10^{-5}$ ; j,  $5.0 \times 10^{-5}$ ; and k,  $1.0 \times 10^{-4}$  M)

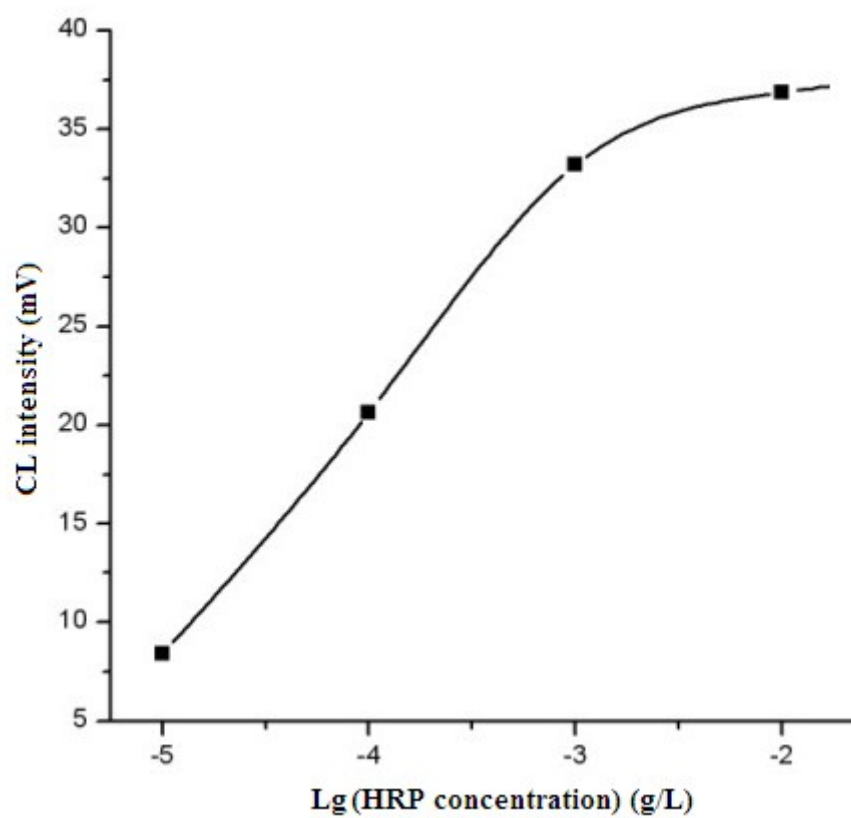

**Figure S3.** Influence of HRP concentration on the CL intensity.

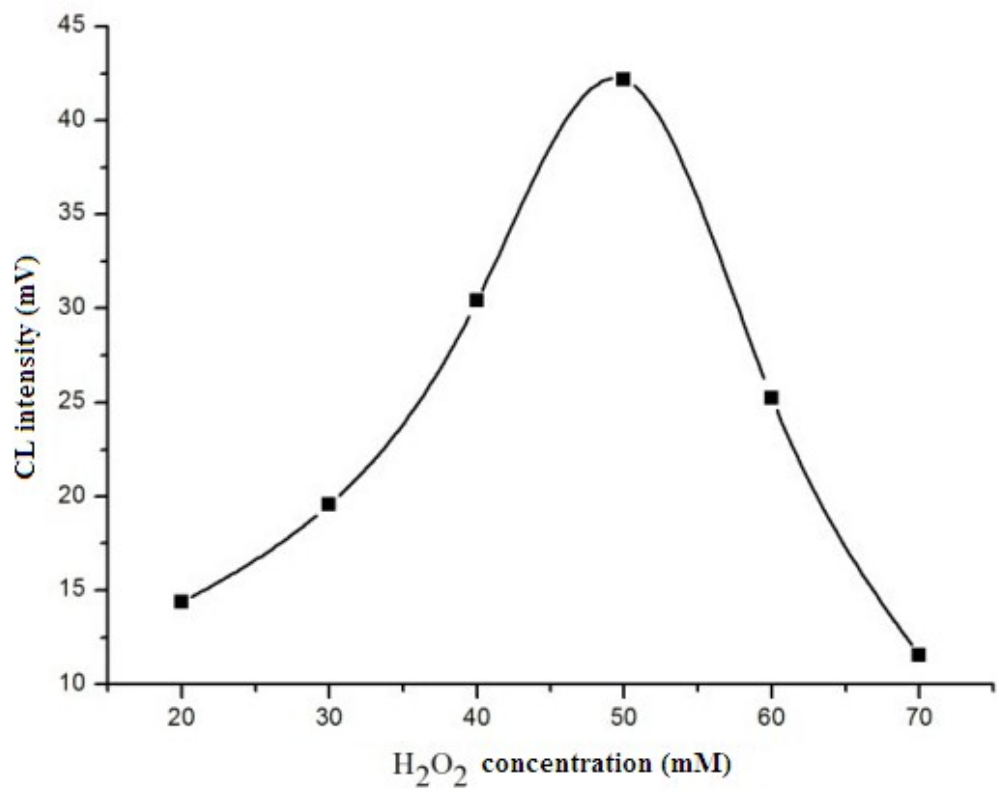

**Figure S4.** Influence of H<sub>2</sub>O<sub>2</sub> concentration on the CL intensity

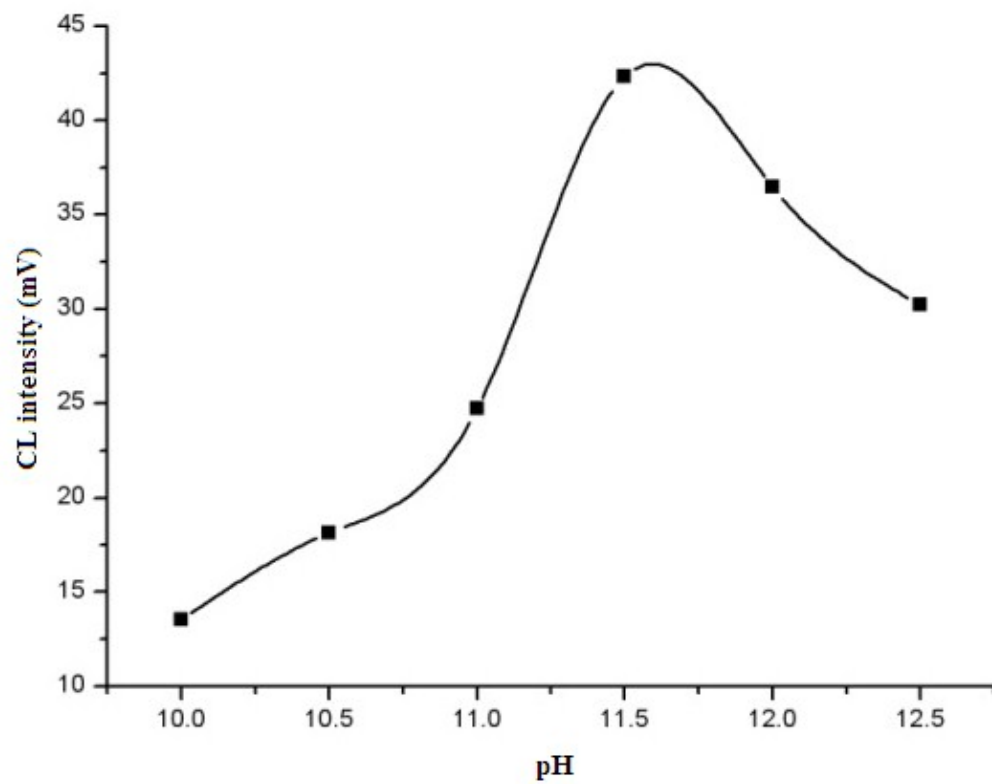

**Figure S5.** Influence of pH of post-column oxidizing reagent on the CL intensity.

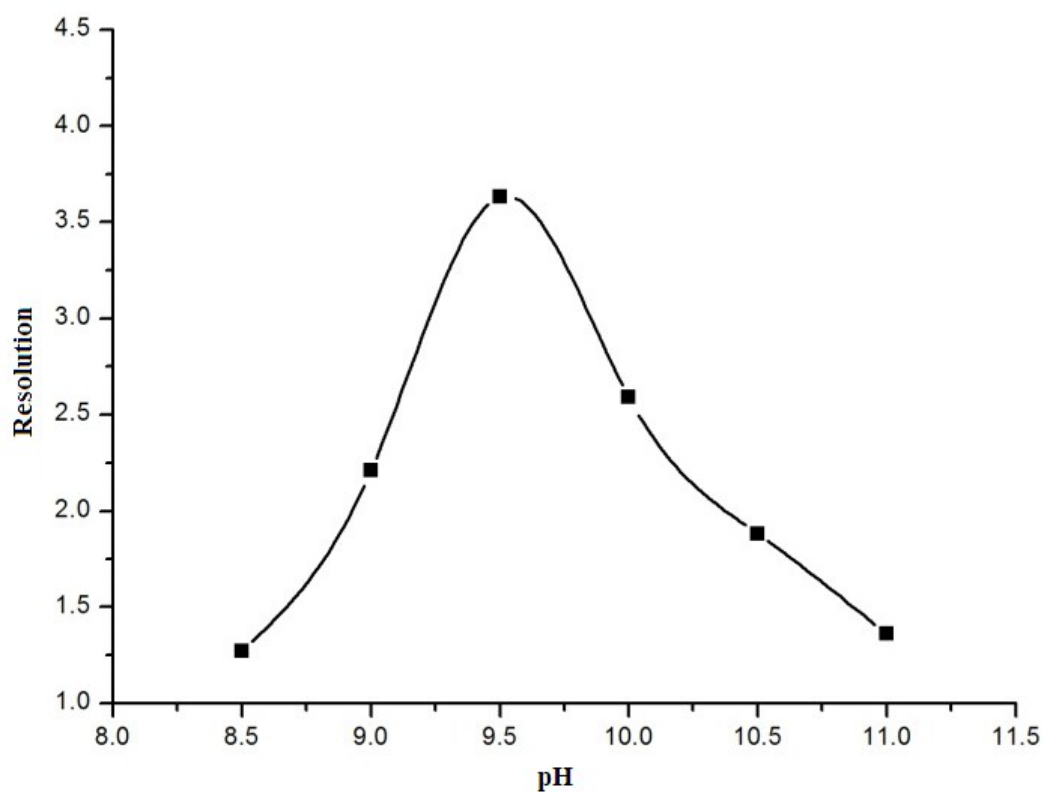

**Figure S6.** Influence of pH of the electrophoresis buffer on the resolution.

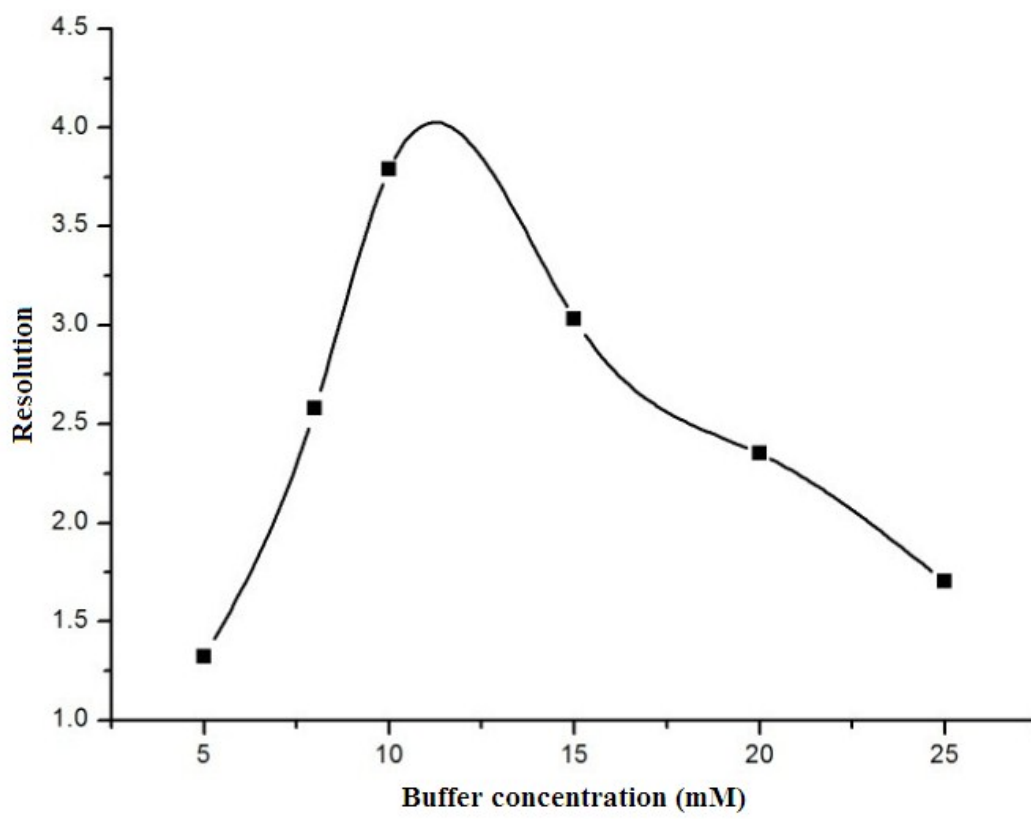

**Figure S7.** Influence of borax concentration on the resolution.



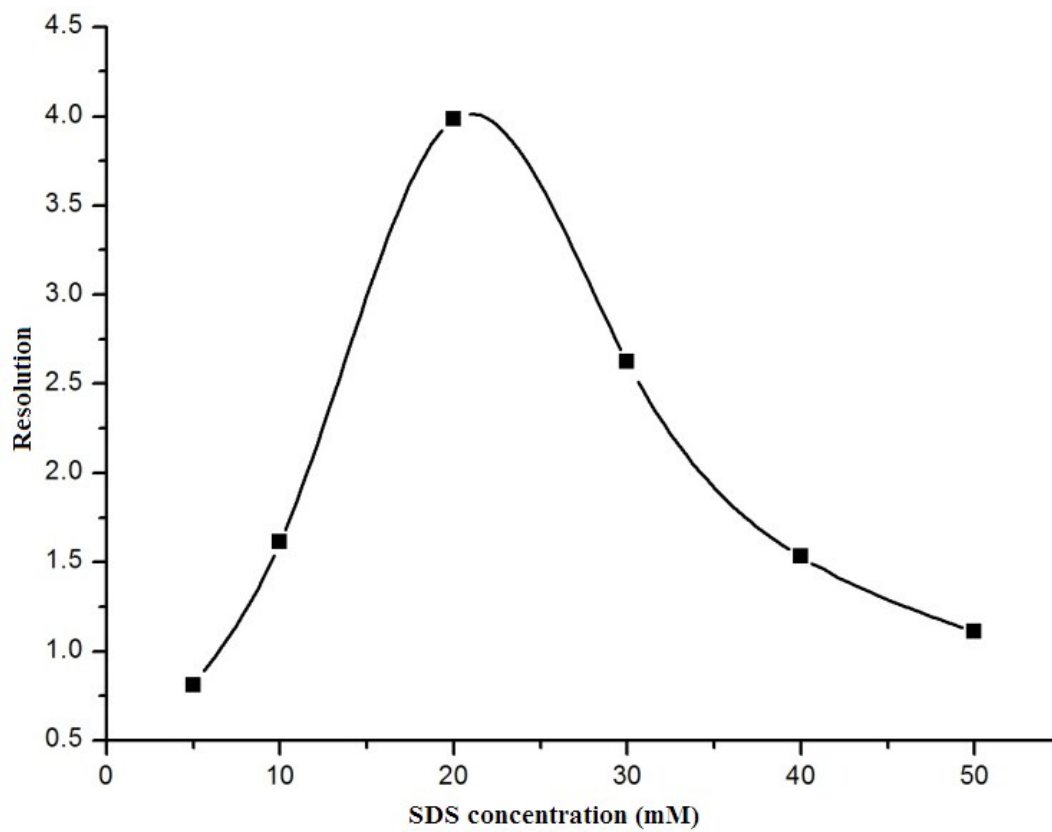

**Figure S8.** Influence of SDS concentration on the resolution.

**Table S1** the sensitivity comparison of different methods for the detection of Te

| Analysis method* | Linearity range                | Detection limit | Reference |
|------------------|--------------------------------|-----------------|-----------|
| MCE-CL           | 0.576–57.6 ng/mL               | 0.288 ng/mL     | 1         |
| CL-IA            | 57.6–5760 pg/mL                | 36 pg/mL        | 2         |
| CE-LIF           | 3.70–2000 ng/mL                | 1.11 ng/mL      | 3         |
| MIA-FD           | 2500 pg/ml                     | 12 pg/ml        | 4         |
| FD               | —                              | 1.47 pg/ml      | 5         |
| ELISA            | —                              | 8.9 pg/mL       | 6         |
| ED               | 300–40000 pg/mL                | 90 pg/ml        | 7         |
| ED               | $5.0 \times 10^{-3}$ –50 ng/mL | 1.7 pg/mL       | 8         |
| LC-MS/MS         | 10–2000 ng/mL                  | 10 ng/mL        | 9         |
| LC-ESI-MS/MS     | 1–5000 pg/mL                   | 1 pg/mL         | 10        |
| CE-CL-IA         | 0.2–10 pg/mL                   | 0.11 pg/mL      | This work |

\*MCE-CL, microchip electrophoresis chemiluminescence detection; CL-IA, chemiluminescence immunoassay; CE-LIF, capillary electrophoresis laser-induced fluorescence detection; FD, fluorescence detection; MIA-FD, microsphere-based duplex competitive immunoassay fluorescence detection; ELISA, enzyme linked immunosorbent assay; LC-MS; liquid chromatography-mass spectrometry, ED, electrochemical detection.

## References

1. Y. Huang, M. Shi, S. Zhao and H. Liang, A sensitive and rapid immunoassay for quantification of testosterone by microchip electrophoresis with enhanced chemiluminescence detection. *Electrophoresis*, 2011, **32**, 3196-3200.
2. P. Luppá, C. Brückner, I. Schwab, S. Hauck, S. Schmidmayr, C. Birkmayer, B. Paulus and H. Hauptmann, Alpha-Biotinylated testosterone derivatives as tracers for a competitive chemiluminescence immunoassay of testosterone in serum. *Clin. Chem.*, 1997, **43**, 2345-2352.
3. H. X. Chen and X. X. Zhang, Antibody development to testosterone and its application in capillary electrophoresis-based immunoassay. *Electrophoresis*, 2008, **29**, 3406-3413.
4. M. Sun, J. Manolopoulou, A. Spyroglou, F. Beuschlein, C. Hantel, Z. Wu, M. Bielohuby, A. Hoefflich, C. Liu and M. Bidlingmaier, A microsphere-based duplex competitive immunoassay for the simultaneous measurements of aldosterone and testosterone in small sample volumes: Validation in human and mouse plasma. *Steroids*, 2010, **75**, 1089-1096.
5. S. H. Bao, Y. F. Peng, S. L. Sheng and O. Lin, Assessment of urinary total testosterone production by a highly sensitive time-resolved fluorescence immunoassay. *J. Clin. Lab. Anal.*, 2008, **22**, 403-408.
6. J. S. Mitchell and T. E. Lowe, Matrix effects on an antigen immobilized format for competitive enzyme immunoassay of salivary testosterone. *J. Immunol. Methods*, 2009, **349**, 61-66.

7. H. Lu, M. P. Kreuzer, K. Takkinen and G. G. Guilbault, A recombinant Fab fragment-based electrochemical immunosensor for the determination of testosterone in bovine urine. *Biosens. Bioelectron.*, 2007, **22**, 1756-1763.
8. M. Eguílaz, M. M. Guzmán, S. Campuzano, A. G. Cortés, P. Y. N. Sedenó and J. M. Pingarrón, An electrochemical immunosensor for testosterone using functionalized magnetic beads and screen-printed carbon electrodes. *Biosens. Bioelectron.*, 2010, **26**, 517-522.
9. D. Borrey, E. Moerman, A. Cockx, V. Engelrelst and M. R. Langlois, Column-switching LC-MS/MS analysis for quantitative determination of testosterone in human serum. *Clin. Chim. Acta*, 2007, **382**, 134-137.
10. M. S. Weinstock, B. L. Williamson, S. Dey, S. Pillai and S. Purkayastha, LC-ESI-MS/MS analysis of testosterone at sub-Picogram levels using a novel derivatization reagent. *Anal. Chem.*, 2012, **84**, 9310-9317.
